# Supplementary material
Source: PubMed Central journal article supplement (PMC2940478)
Supplement: me.2009-0530_1.pdf [file me.2009-0530_1.pdf]

## Supplemental Data

### Diagram of the GnRHR signaling network - .xml version

This file can be opened, viewed and edited by users using CellDesigner, a freely available process diagram editor for gene-regulatory and biochemical networks (see Ref. 14 in the main manuscript). The CellDesigner tool can be downloaded at <http://celldesigner.org/>. The interactions of the signaling network are supported by PMIDs, which are stored on the appropriate edges within this .xml file. Likewise, the species of the signaling network are supported by GeneIDs, which are stored on the appropriate entities within this .xml file. When selecting an edge, the user may view the PMID(s) within the Edit Notes frame for that edge. Similarly, when selecting an entity, the user can view the GeneID(s) within the Edit Notes frame for that entity.
